# Supplementary material
Source: PubMed Central journal article supplement (PMC7736206)

Supplemental Figure 8

a

Control

Experimental 1 dpa

Experimental 3 dpa

Experimental 5 dpa

Glt1

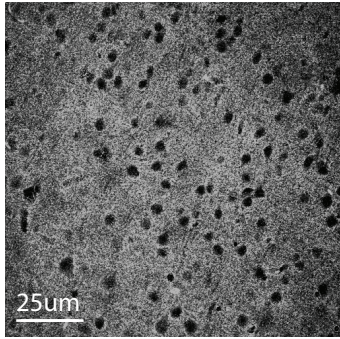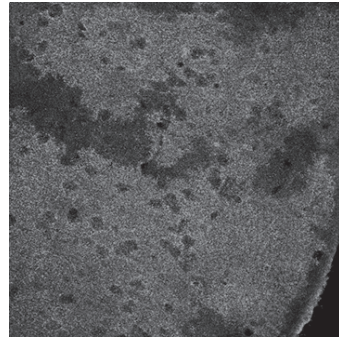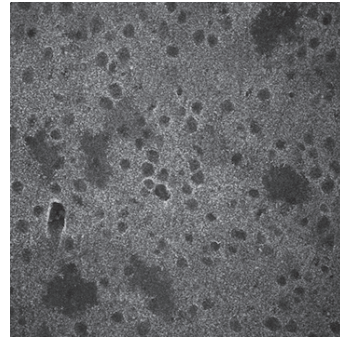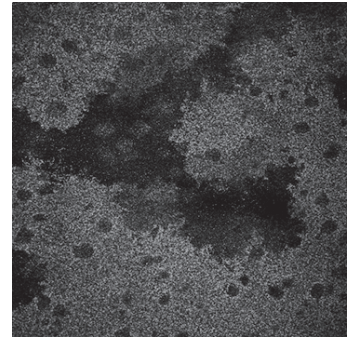

S100b

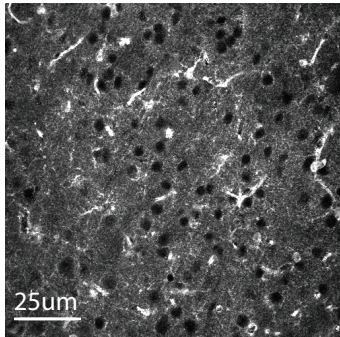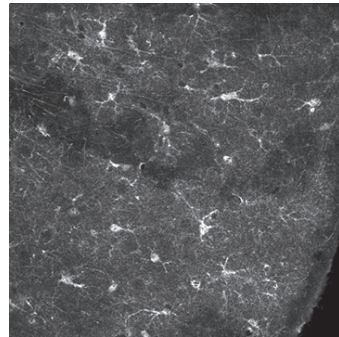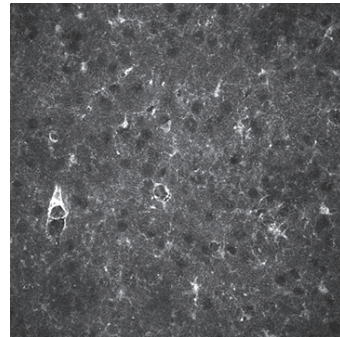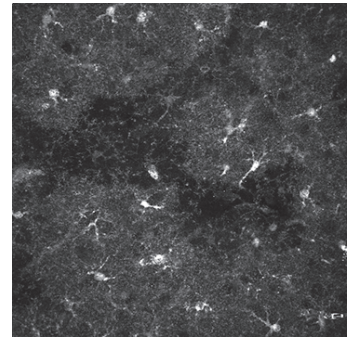

BrdU

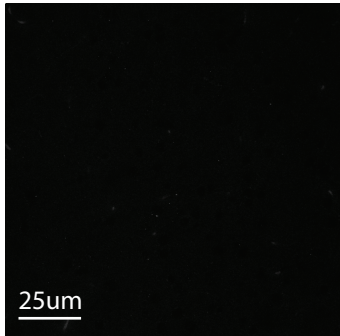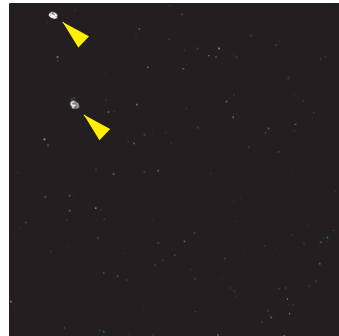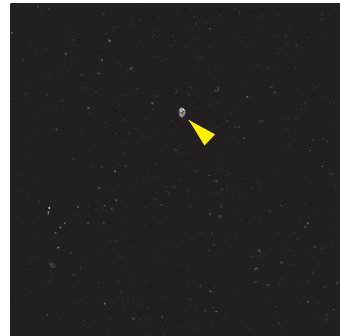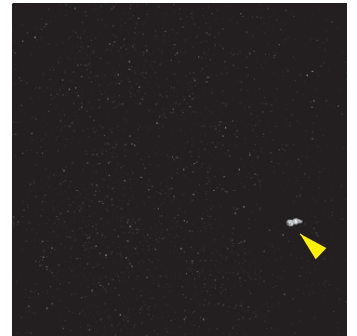

Glt1 S100b BrdU

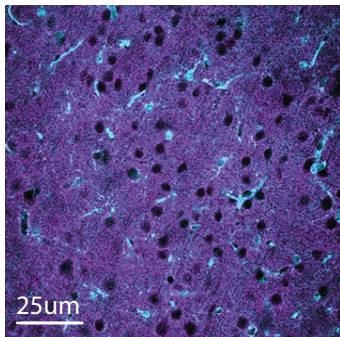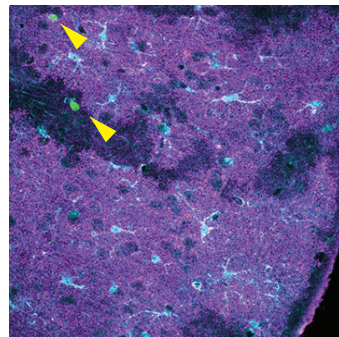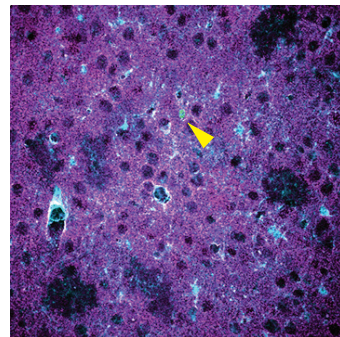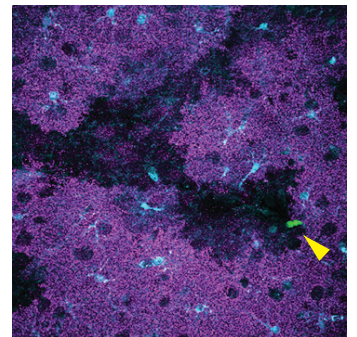

Supplement: NIHMS1640343-supplement-Supplementary_Figure_8.pdf [file NIHMS1640343-supplement-Supplementary_Figure_8.pdf]
