# Supplementary material
Source: PubMed Central journal article supplement (PMC7736206)
Supplement: NIHMS1640343-supplement-Supplementary_Figure_1.pdf [file NIHMS1640343-supplement-Supplementary_Figure_1.pdf]

Supplemental Figure 1

Control

Experimental 11dpa

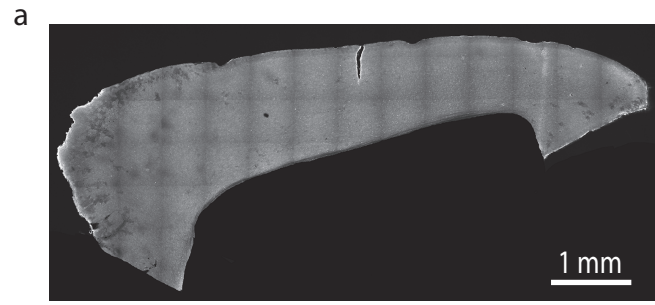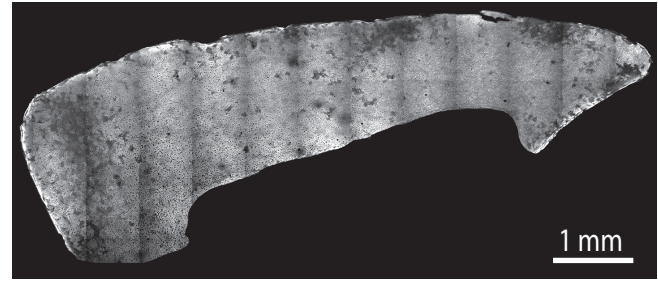

b Image Binarization using intensity parameters

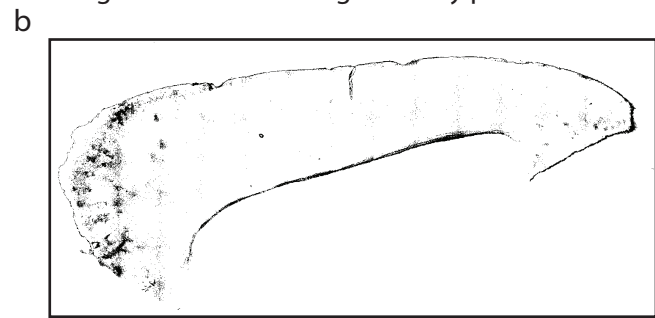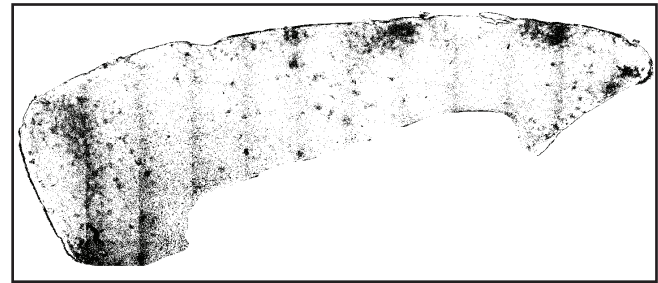

c Fill holes algorithm

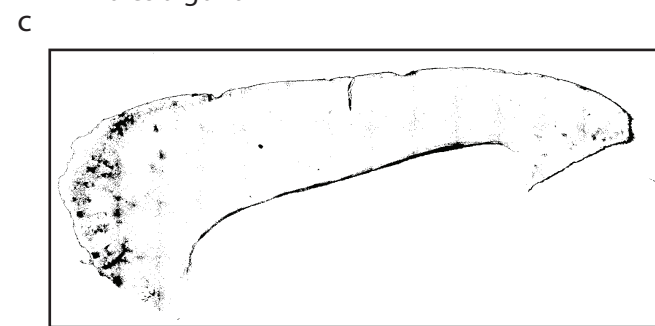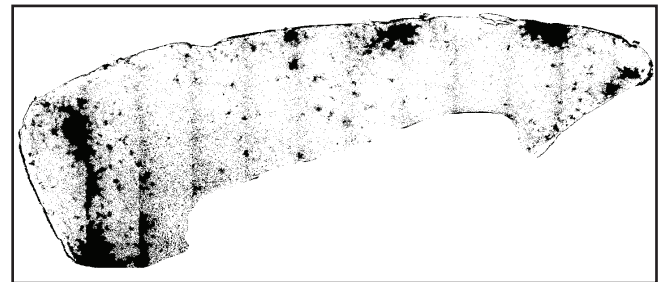

d Select for Glt1 loss

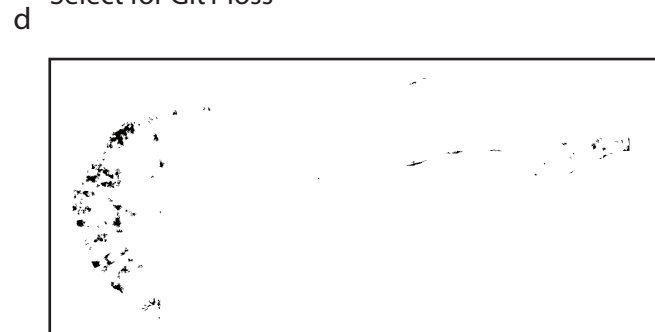

2.12% loss

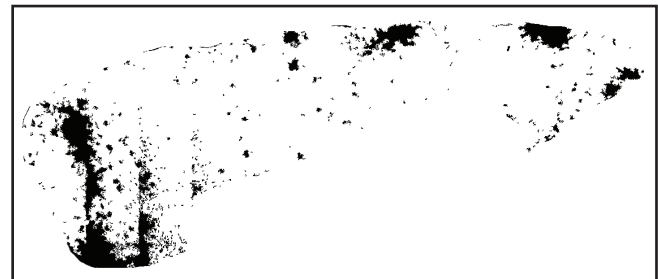

10.84% loss
