# Supplementary material
Source: PubMed Central journal article supplement (PMC7736206)

## Supplemental Figure 2

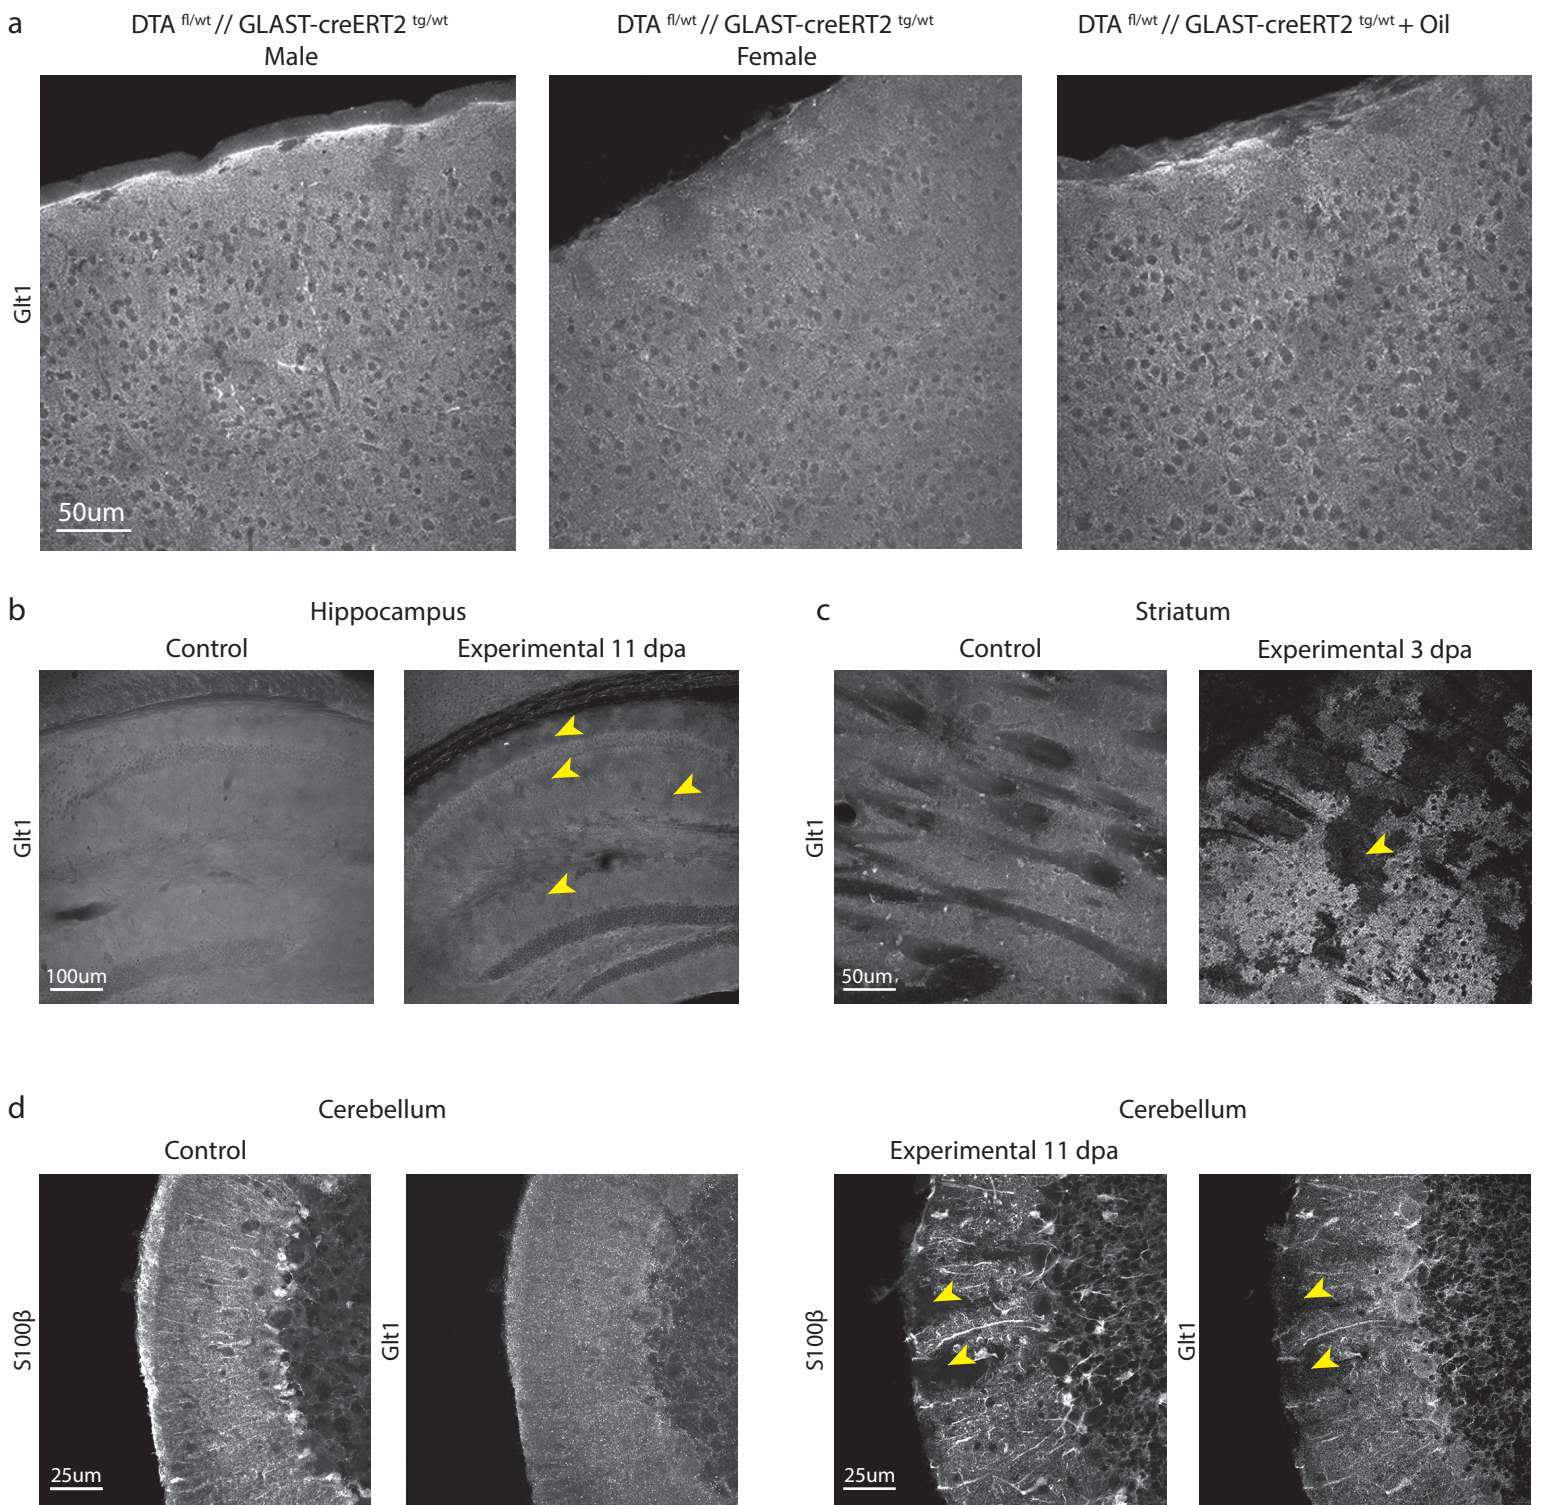

Supplement: NIHMS1640343-supplement-Supplementary_Figure_2.pdf [file NIHMS1640343-supplement-Supplementary_Figure_2.pdf]

Supplemental Figure 3

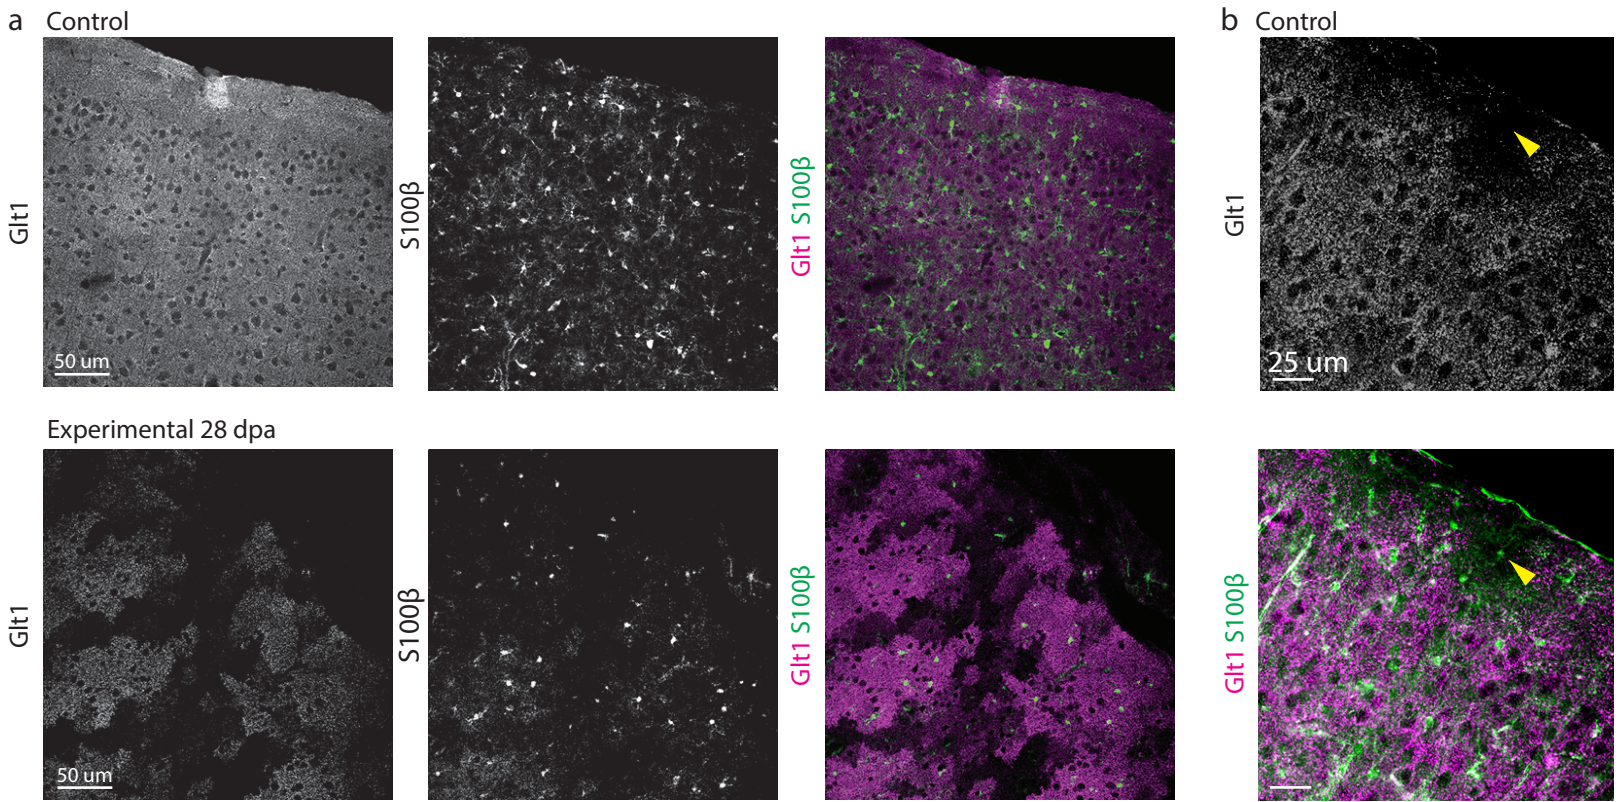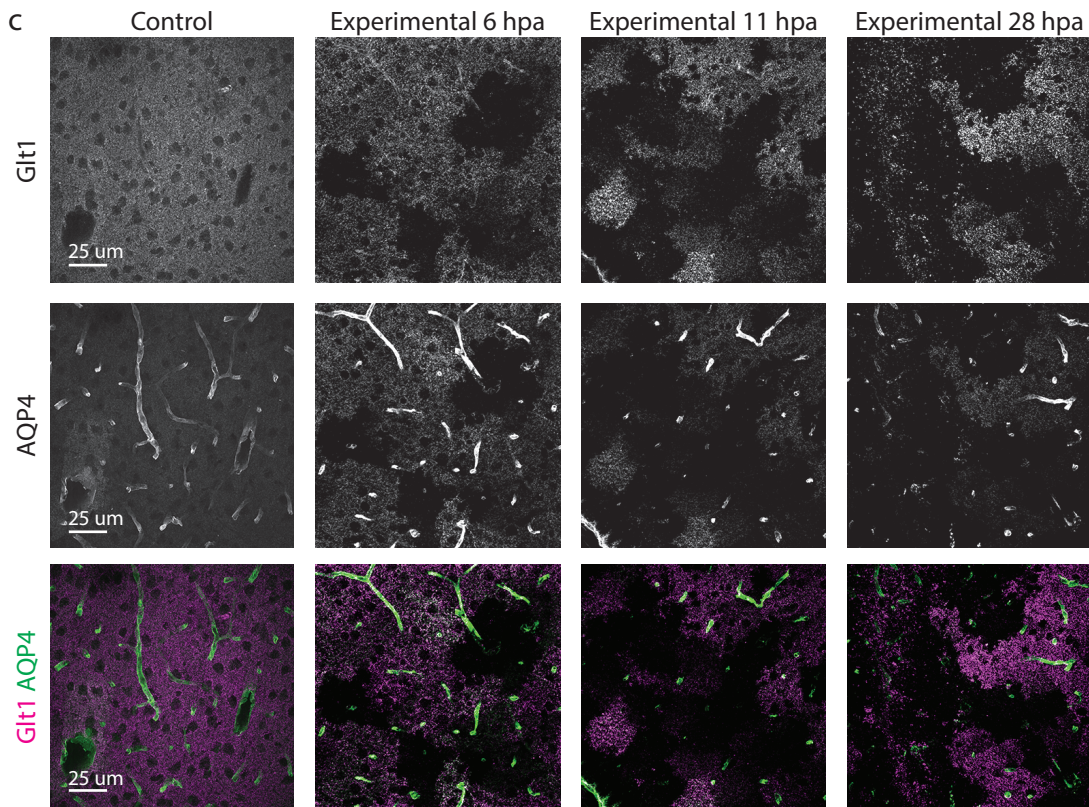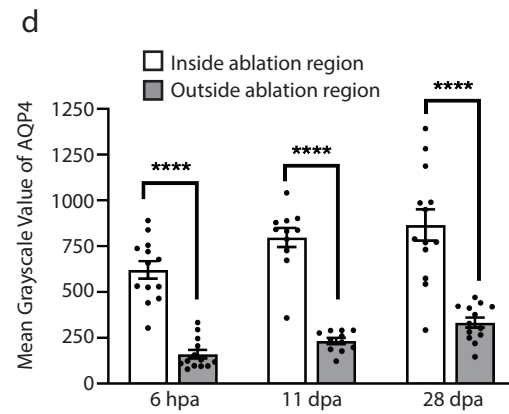

Supplement: NIHMS1640343-supplement-Supplementary_Figure_3.pdf [file NIHMS1640343-supplement-Supplementary_Figure_3.pdf]

Supplemental Figure 4

a

Control

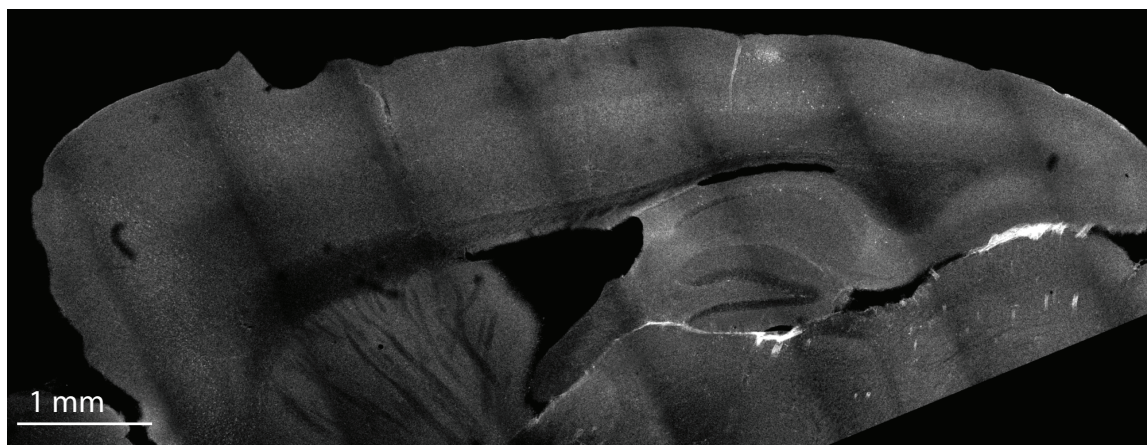

Cadaverine

Experimental 3 dpa

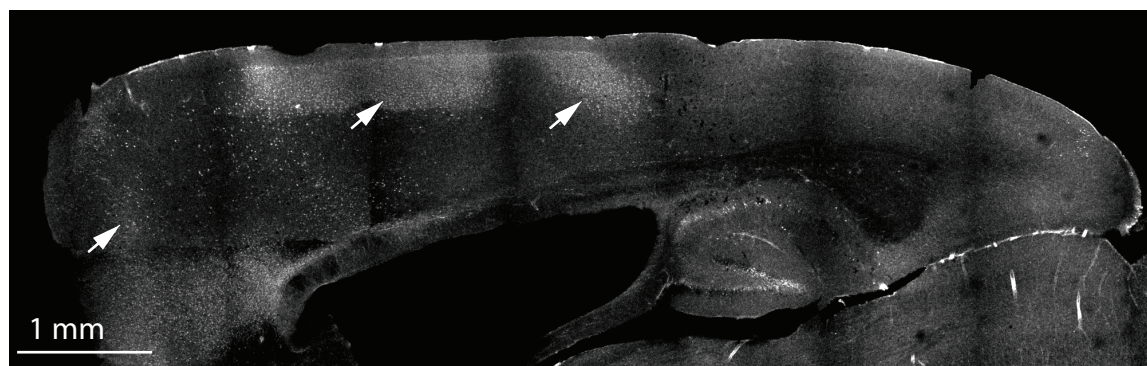

Supplement: NIHMS1640343-supplement-Supplementary_Figure_4.pdf [file NIHMS1640343-supplement-Supplementary_Figure_4.pdf]

Supplementary Figure 5

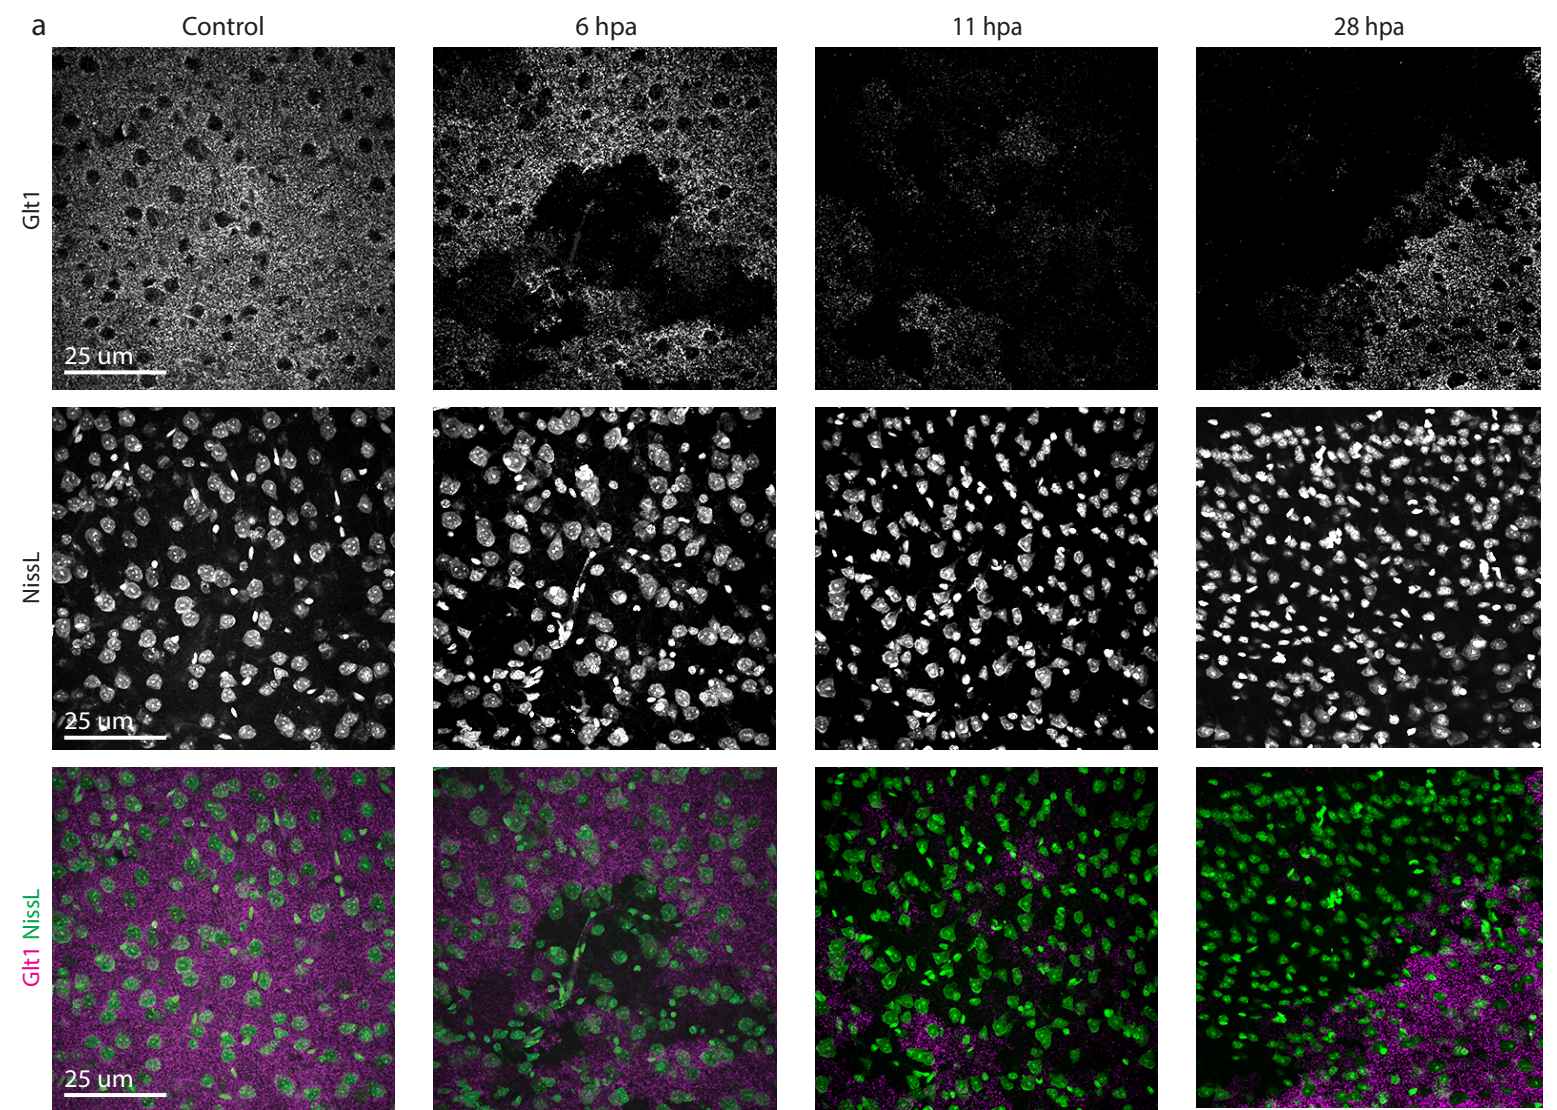

Supplement: NIHMS1640343-supplement-Supplementary_Figure_5.pdf [file NIHMS1640343-supplement-Supplementary_Figure_5.pdf]

Supplementary Figure 6

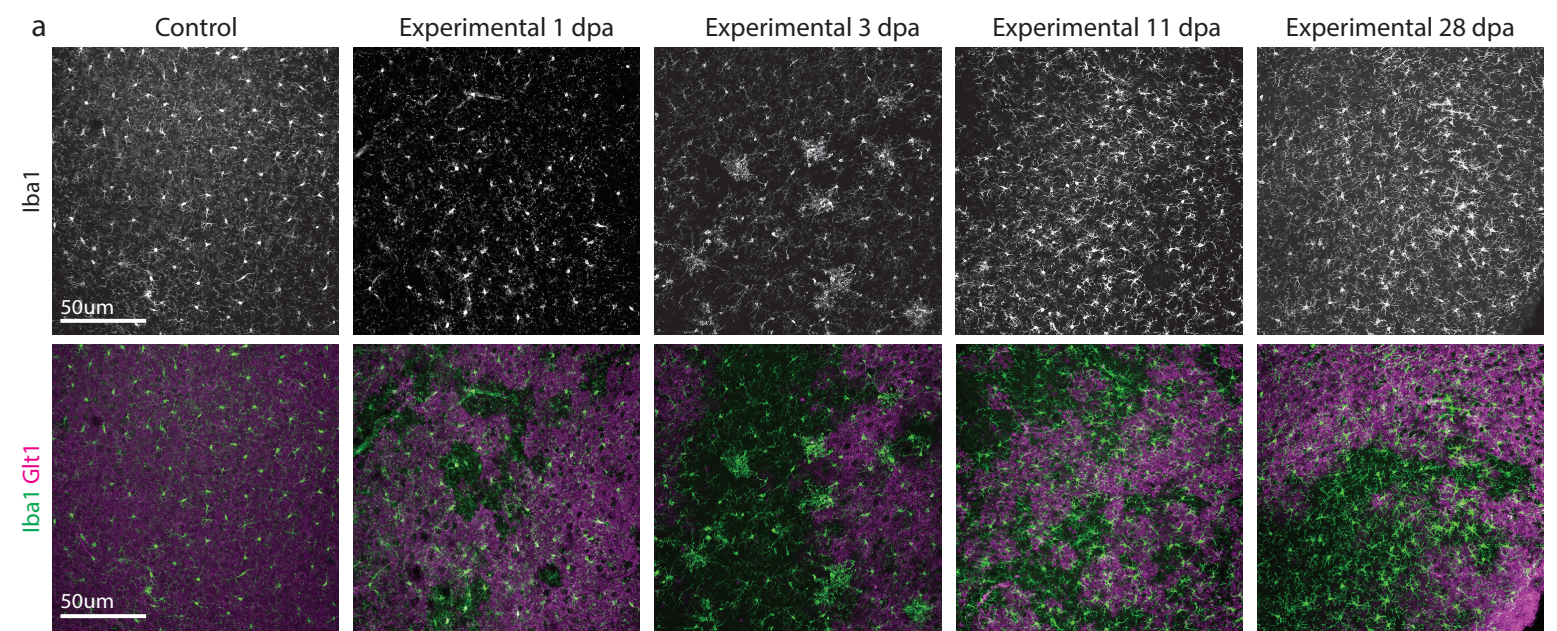

Supplement: NIHMS1640343-supplement-Supplementary_Figure_6.pdf [file NIHMS1640343-supplement-Supplementary_Figure_6.pdf]

Supplemental Figure 7

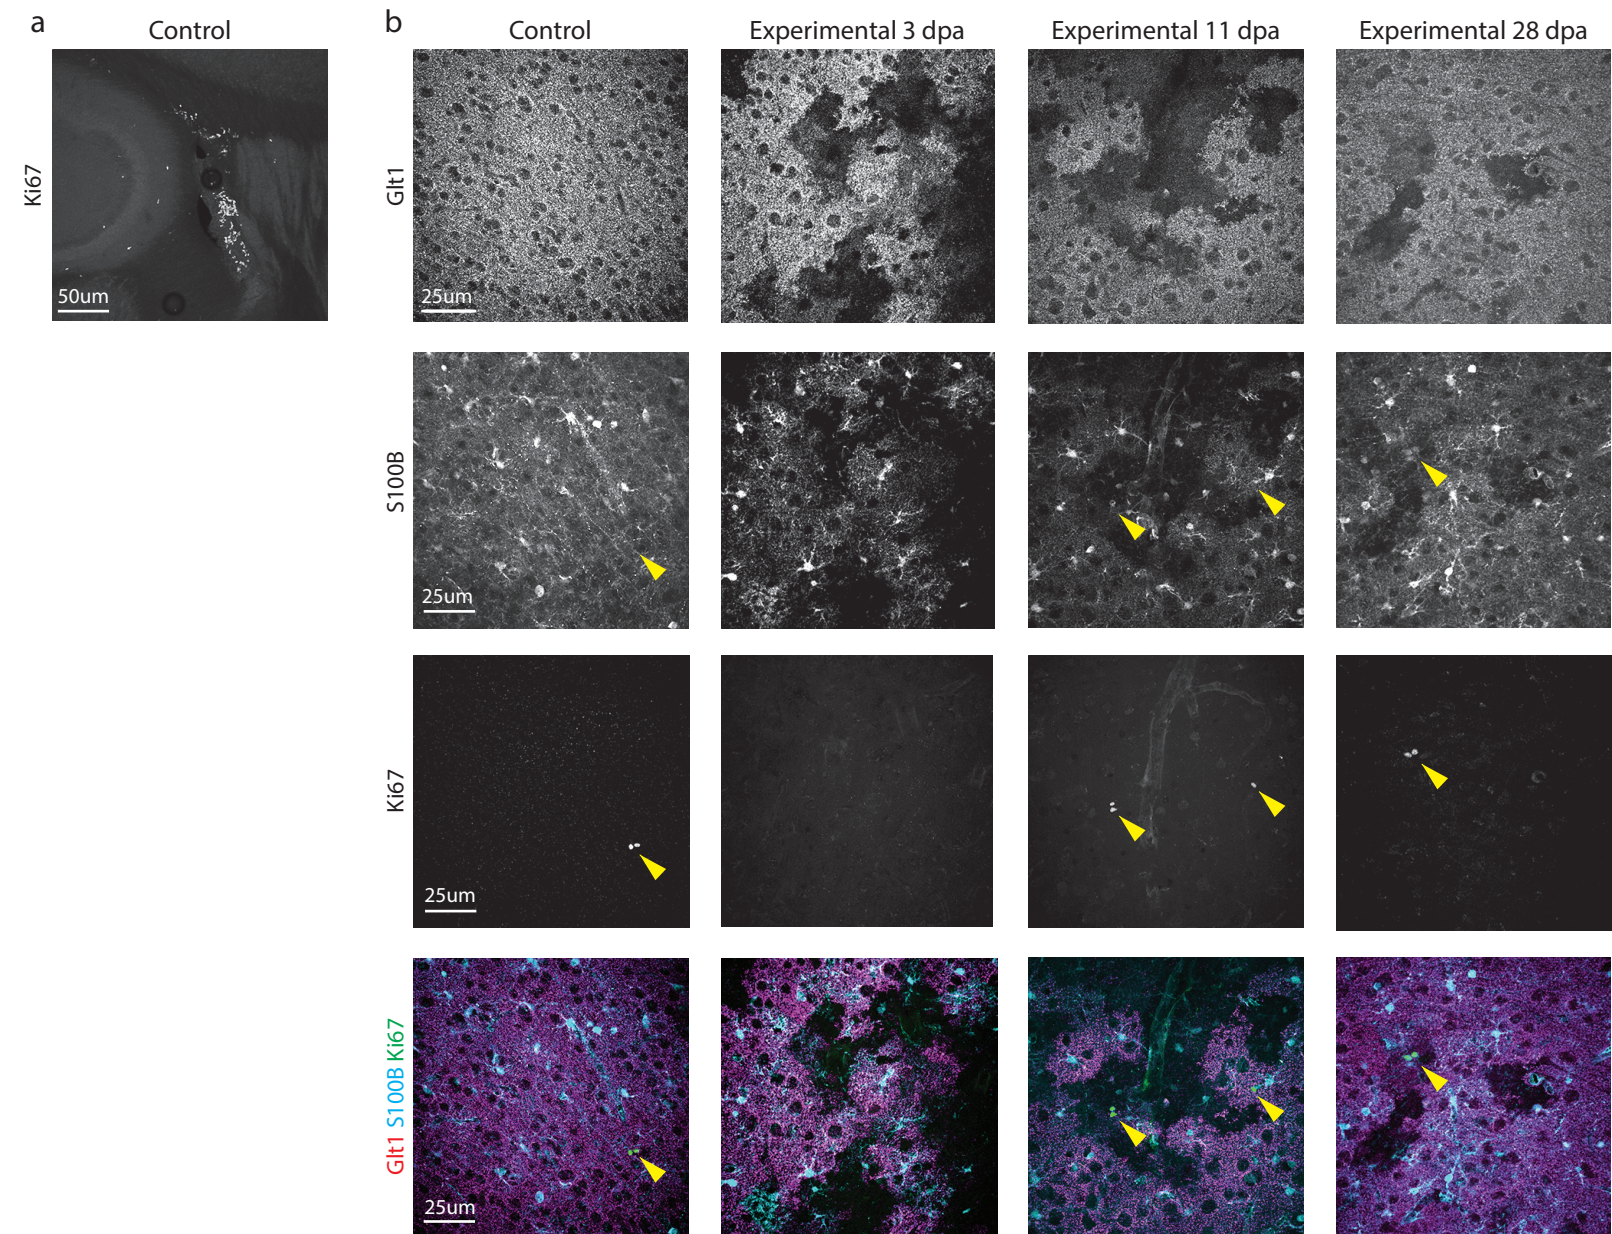

Supplement: NIHMS1640343-supplement-Supplementary_Figure_7.pdf [file NIHMS1640343-supplement-Supplementary_Figure_7.pdf]
